# Supplementary material
Source: Springer Nature journal article supplement (https://www.springermedizin.de/resource/supplementary/12885_2010_2701_MOESM1_ESM.pdf/9461740)

a) Local control

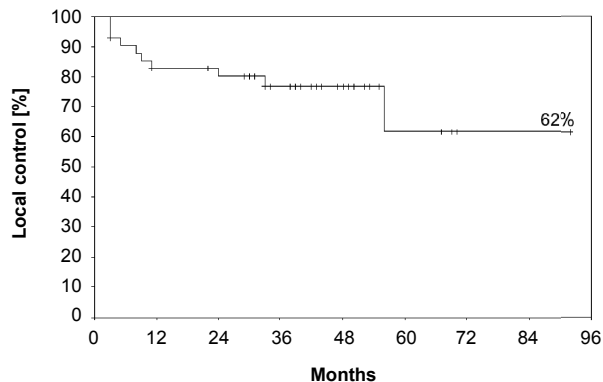

b) Distant disease-free survival

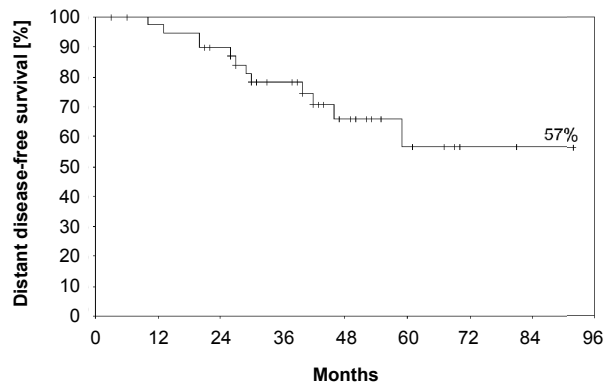

c) Disease-free survival

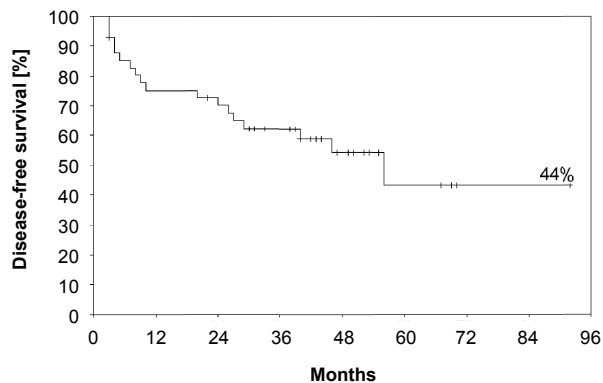

d) Overall survival

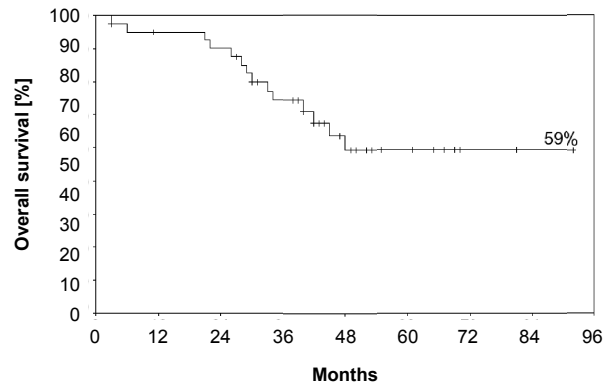

Supplement: MOESM1 [file 9461740]
